1            Habitual and supplemented prebiotic diets and their links to  
2            inflammatory serum markers and hypothalamic microstructure in  
3            young, overweight adults: a pre-registered study.

4  
5    Emmy Töws<sup>1,2\*</sup>, Evelyn Medawar<sup>1,2,4\*</sup>, Ronja Thieleking<sup>1</sup>, Frauke Beyer<sup>1,2</sup>, Michael Stumvoll<sup>3</sup>,  
6    Arno Villringer<sup>1,2,4,5</sup>, A. Veronica Witte<sup>1,2#</sup>

7    1 Cognitive Neurology, University Medical Center Leipzig, Germany

8    2 Max Planck Institute for Human Cognitive and Brain Sciences, Department of Neurology, Leipzig, Germany

9    3 Clinic for Endocrinology and Nephrology, University Medical Center Leipzig, Germany

10    4 Berlin School of Mind and Brain, Humboldt-Universität zu Berlin, Germany

11    5 Charité - Universitätsmedizin Berlin; Humboldt-Universität zu Berlin, Germany

12    \* These authors contributed equally.

13    #corresponding author

14    **Email addresses** ET [toews@cbs.mpg.de](mailto:toews@cbs.mpg.de) , EM [medawar@cbs.mpg.de](mailto:medawar@cbs.mpg.de), RT

15    [thieleking@cbs.mpg.de](mailto:thieleking@cbs.mpg.de) , FB [fbeyer@cbs.mpg.de](mailto:fbeyer@cbs.mpg.de), VW [witte@cbs.mpg.de](mailto:witte@cbs.mpg.de) , AV

16    [villringer@cbs.mpg.de](mailto:villringer@cbs.mpg.de), MS [michael.stumvoll@medizin.uni-leipzig.de](mailto:michael.stumvoll@medizin.uni-leipzig.de)

17

18    **Conflict of interest statement**

19    The authors declare no competing financial interests.

20

21    **Acknowledgements**

22    We thank all participants of the GUT-BRAIN study. This work was funded by grants of the

23    German Research Foundation (DFG), contract grant number 209933838 CRC1052-03 A1 to

24    A.V.W and M.S., and by the Berlin School of Mind and Brain (stipend for E.M.) and the German  
NOTE: This preprint reports new research that has not been certified by peer review and should not be used to guide clinical practice.

25    Foundation for Environment (stipend for E.M.). The inulin supplement was sponsored by the

26 manufacturer BENE0 GmbH, Mannheim, Germany. We would like to thank all those who  
27 contributed to the conduction of the GUT- BRAIN study, whether it was recruitment of  
28 participants, data acquisition, data organization, data storage or data curation and analysis:  
29 Larissa de Biasi, Anne-Katrin Brecht, Anna Bujanow, Leonie Disch, Lina Eisenberg, Silke  
30 Friedrich, Laura Hesse, Niklas Hlubek, Bettina Johst, Mandy Jochemko, Anke Kummer,  
31 Domenica Klank, Lorenz Lemcke, Ramona Menger, Lynn Mosesku, Maria Pärisch, Susan  
32 Prejawa, Lukas Recker, Lennard Schneidewind, Emira Shehabi, Hannah Stock, Torsten  
33 Schlumm, Christian Schneider, Anna-Luisa Wehle, Charlotte Wiegank, and Marie Zedler.

34

35

36

### 37 **Abstract**

38 Background: Prebiotic dietary fiber and related metabolites have been suggested to attenuate  
39 low-grade systemic and central inflammation through improving gut-brain axis signaling. We  
40 here aimed to test whether habitual or short-term high-dose fiber intake is linked to  
41 inflammatory markers in blood and to indicators of central hypothalamic inflammation.

42 Methods: In total, 59 adults (19 women, aged 28.3 years  $\pm$  6.6 SD, mean body mass index,  
43 BMI, 27.3  $\pm$  1.5 SD) were included into analyses. Participants completed a food frequency  
44 questionnaire, underwent diffusion-weighted magnetic resonance imaging (MRI) at 3 Tesla  
45 for provision of mean diffusivity (MD) as a marker of brain tissue inflammation and donated  
46 fasting blood. Measurements took place at up to 4 timepoints, i.e. before and after 14 days of  
47 supplementary fiber and placebo intake, respectively. High-sensitive C-reactive protein (CRP),  
48 tumor-necrosis factor alpha (TNF- $\alpha$ ) and interleukin-6 (IL6) were assessed in serum. The study  
49 was preregistered at <https://osf.io/uzbav>.

50 Results: Habitual and interventional high-fiber diet was not significantly associated with  
51 neither inflammatory markers ( $|\beta_{\text{intervention}}| > 0.1$ ,  $p > 0.32$ ) nor with hypothalamic MD  
52 ( $|\beta_{\text{intervention}}| = 1.8$ ,  $p = 0.07$ ) according to linear mixed effects modeling. Male sex and higher  
53 body fat mass related to higher CRP. Further, higher BMI was borderline related to lower  
54 hypothalamic MD.

55 Conclusions: In this sample of overweight adults, dietary fiber intake was not related to  
56 inflammatory blood markers or hypothalamic microstructure. Instead, sex and body  
57 composition were of higher importance for prediction of interindividual differences in  
58 markers of (neuro)inflammation.

59

60

#### 61 **Significance Statement (max.120 words)**

62 Prebiotic dietary fiber has been discussed to lower systemic and central inflammation. While  
63 previous studies investigated the effects of fiber on inflammatory blood markers, the  
64 knowledge of the effect of fiber on neuroinflammation is limited. Thus, in this pre-registered  
65 randomized controlled trial analysis we examined the relationship between dietary fiber  
66 intake and inflammatory markers in blood and hypothalamus. 3T MRI and blood markers were  
67 assessed before and after high-fiber intake and placebo in 59 adults. In our overweight study  
68 sample of 19-42 years old adults, fiber intake had no significant impact on inflammatory  
69 markers. The current null findings can inform future nutrition neuroimaging trials and add to  
70 the discussion about how diet may affect brain structure and function.

71

72 Keywords: diffusion weighted imaging, hypothalamus, mean diffusivity, inflammatory  
73 markers, brain microstructure, high fiber diet, lifestyle intervention

## 74 **Introduction**

75 High-fat diet and fat accumulation can trigger low-grade systemic inflammation, leading to  
76 maladaptive changes in food intake-related brain areas such as the hypothalamus (Thaler and  
77 Schwartz 2010, Sewaybricker et al., 2023). Diets high in saturated fatty acids may activate  
78 inflammatory pathways (Rocha et al. 2016) and modulate intestinal microbiota. Thereby, they  
79 increase intestinal permeability and induce systemic inflammation (Cani et al. 2008;  
80 Deopurkar et al. 2010; Lassenius et al. 2011). Consequently, inflammatory serum factors  
81 which cross the blood-brain barrier can provoke dysfunctional changes in brain areas such as  
82 the hypothalamus (Van Dyken and Lacoste 2018).

83 In contrast to high-fat diets, high-fiber diets have been discussed to exert anti-inflammatory  
84 effects in gut and circulation (Dalile et al. 2019; Medawar et al. 2019). Dietary fibers are  
85 converted into short-chain fatty acids (SCFAs) through bacterial fermentation in the colon.  
86 SCFAs alleviate inflammatory processes at their production site in the colon and systemically  
87 after entering blood circulation (Morrison and Preston 2016).

88 In the gut, SCFA contribute to a decreased permeability of the intestinal membrane by  
89 facilitating tight-junction-assembly. Thus, bacteria expressing proinflammatory  
90 lipopolysaccharides on their surface are prevented from entering extraintestinal circulation  
91 (Luying Peng, Zhong-Rong Li, Robert S. Green, Ian R. Holzman 2009). Hence, extraintestinal  
92 inflammation initiated by bacterial components can be contained. Additionally, SCFAs have  
93 been suggested to act via the immune pathway influencing systemic and neuroinflammation  
94 (Dalile et al. 2019).

95 Moreover, dietary fiber or its derivative SCFAs promote the secretion of gut-derived  
96 anorexigenic hormones, such as glucagon-like peptide-1 (GLP-1) and peptide YY (PYY). These  
97 hormones induce satiety via the suppression of appetite-stimulating hypothalamic

98 neuropeptide Y (NPY) neurons and the activation of appetite-suppressing pro-  
99 opiomelanocortin (POMC) neurons in the hypothalamus (De Silva and Bloom 2012). Thereby,  
100 SCFAs may contribute to higher satiety. Higher satiety in turn may lead to less high-fat food  
101 consumption (Byrne et al. 2015) resulting in lower inflammatory parameters. An alleviation of  
102 inflammatory processes may potentially link to higher functional hypothalamic integrity and  
103 therefore a more sensitive regulation of appetite.

104 Human, cross-sectional epidemiological studies report that higher habitual high-fiber diet  
105 links to lower levels of peripheral inflammatory markers (Ma et al. 2008; Mazidi et al. 2018;  
106 Wannamethee et al. 2009). Interventional studies which examine a potential association  
107 between fiber intake and inflammatory processes are however scarce and limited in sample  
108 size. One randomized clinical interventional study investigated 35 (18 obese and 17 lean)  
109 individuals following either a “Dietary Approaches to Stop Hypertension” diet (DASH, a diet  
110 rich in fiber and low in dairy and saturated fat) or a high-fiber supplementation diet (30g/day  
111 of psyllium) for 3 weeks respectively in a cross-over design (King et al. 2007). Although both  
112 diets reduced C-reactive protein (CRP) levels, the fiber supplement showed slightly stronger  
113 effects than the DASH diet. Notably, only lean participants showed an amelioration of  
114 inflammatory markers. This clinical interventional study indicates that fiber may causally  
115 lower inflammatory markers, especially in lean individuals.

116 In sum, previous studies imply that dietary factors relate to (neuro-)inflammation in distinct  
117 ways, and some suggest prebiotic dietary fiber as anti-inflammatory agent. Yet, it remains  
118 unclear if a high-fiber diet relates to lower systemic and hypothalamic inflammation in non-  
119 lean individuals. Therefore, this randomized controlled study in a homogenous, well-  
120 characterized cohort of overweight adults aims to investigate whether dietary fiber exerts  
121 beneficial effects on markers of systemic inflammation and hypothalamic microstructure.

122 According to pre-registration (<https://osf.io/uzbav>), we hypothesized that higher habitual  
123 dietary fiber intake, measured using self-report of dietary habits over the course of seven  
124 days, correlates with (1) lower levels of the inflammatory markers interleukin-6 (IL-6), CRP,  
125 and tumor-necrosis factor alpha (TNF- $\alpha$ ) in blood, and (2) with lower microstructural  
126 coherence in the hypothalamus measured using mean diffusivity (MD) derived from diffusion-  
127 weighted magnetic resonance imaging (MRI). In addition, we hypothesized that a two-week  
128 prebiotic fiber intervention (30 g inulin/d) would lead to improvements in blood (3) and brain  
129 markers (4).

130

## 131 **Material and Methods**

### 132 Ethics Approval and Recruitment

133 This study is part of a within-subject cross-over randomized controlled trial (RCT) investigating  
134 the effects of a prebiotic intervention on the gut-brain axis (Medawar et al., Gut, in press). The  
135 institutional Ethics Board of the Medical Faculty of the University of Leipzig, Germany, raised  
136 no concerns regarding the study protocol (228/18-ek) and all participants provided written  
137 informed consent. Recruitment took place via the institute's database and advertisements.  
138 Remuneration was 9-10€/h and an additional bonus payment of 30€ for completing the study.  
139 The RCT was registered at ClinicalTrials.gov (#NCT03829189) and this analysis was pre-  
140 registered at <https://osf.io/uzbav>.

141

### 142 Study Population

143 Out of 106 screened individuals we included a sample of 59 overweight adults (19 females, 40  
144 males), aged 19-42 years (28 years  $\pm$  6.2 SD, BMI range 25-30 kg/m<sup>2</sup>, mean 27.3 kg/m<sup>2</sup>  $\pm$  1.4  
145 SD), for a flowchart, see **Extended Figure 1-1**. All participants assigned to either being female

146 or male (alternative options: diverse, preferring not to report). Due to anatomical differences  
147 between females and males, we referred to female and male 'sex' considering differences in  
148 anthropometrics or brain morphology. Female and male 'gender' was used in all other  
149 occasions.

150

### 151 Inclusion/Exclusion criteria

152 Inclusion criteria for this study were an age range of 18-45 years, a BMI of 25-30 kg/m<sup>2</sup> upon  
153 first baseline assessment, no MRI contraindications, an omnivorous, non-restrictive diet, and  
154 no food allergies. Further any type of diet or antibiotic treatment in the last 3 months led to  
155 exclusion. Additionally, female participants had to regularly use oral or alternative  
156 contraceptives to minimize hormonal variations induced by the menstrual cycle. Pregnant and  
157 lactating women were not allowed to take part in the study. Participants were excluded if they  
158 suffered from a diagnosed neurological, psychiatric, or metabolic disorder. Diseases of the  
159 gastrointestinal tract, cardiovascular system, lung, liver, or kidneys led to exclusion as well as  
160 the intake of medication acting on the central nervous system. Daily alcohol intake had to be  
161 at a maximum of 50 grams. Limits for cigarette and coffee consumption were set to 10  
162 cigarettes and 6 cups of coffee per day. Participants were dropouts when the supplement  
163 intake was missed out for more than 48 hours or if more than half of the 26 portions were  
164 missed out.

165

### 166 Study Design

167 Participants underwent up to four assessments over the course of ~6-10 weeks and in-  
168 between two assessments, they supplemented their diet with high-dosed prebiotic fiber (2  
169 sachets of 15 g inulin/d), and with placebo (2 sachets isocaloric maltodextrin), respectively for

170 14 days (**Figure 1**). Specifically, daily intake of 30 g inulin contained 63 kcal and 26.7 g fiber  
171 (Orafti® Beneo Synergy1, BENE0 GmbH, Mannheim, Germany) and placebo intake consisted  
172 of 16 g maltodextrin (63 kcal, 0 g fiber). Randomized allocation to study arm 1 or 2 determined  
173 the order of supplement intake. A wash-out period of at least 14 days was set between each  
174 of the interventions to avoid carry-over effects from the first intervention on the second.

175

176

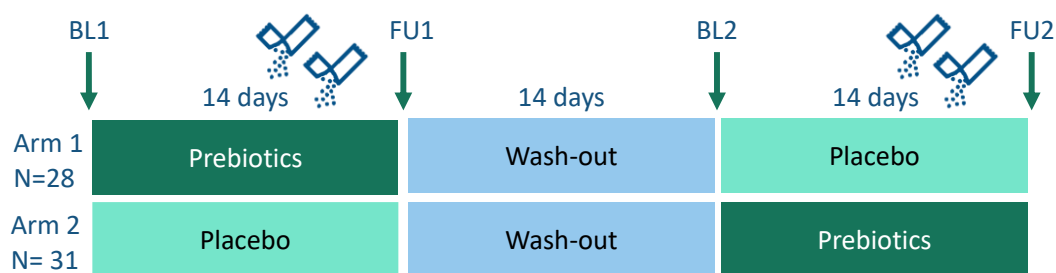

177

178 **Figure 1: Study design.** Each participant underwent up to four assessments: Baseline 1 (BL1, before first  
179 intervention), Follow-up 1 (FU1, after first intervention), Baseline 2 (before second intervention), Follow-up 2  
180 (after second intervention). In-between two assessments participants supplemented their diet either with  
181 “prebiotics” (30g of inulin) or “placebo” (isocaloric maltodextrin). Participants were randomly allocated to study  
182 arm 1 or 2 which determined the order of supplement intake. A washout period of at least 14 days was set  
183 between interventions.

184

185 During the first three days of the intervention period the participants were asked to take one  
186 portion (15 g) of the supplement daily. Starting on day 4 and continuing through day 14, the  
187 amount of intake consisted of two portions daily (30 g). On day 15 (day of measurement) one  
188 sachet was added to a standardized breakfast shake after overnight fast and blood draw, so  
189 that one intervention period included 26 portions. We recommended to take the supplement  
190 before 5 p.m. to achieve a proper digestion before sleep. Fasting blood samples,  
191 anthropometrics, dietary habits and MRI were acquired on all four assessment days.

192

193

194



195 Inflammatory markers

196 Participants were asked to fast from the evening prior to the blood drawing (mean 12.5 h ±  
197 2.2 SD). The fasting blood samples were collected by trained staff at the same time point for  
198 each of the four measurements (using safety-multifly needles (21G, 200mm)). Blood samples  
199 were centrifuged at 3,500 revolutions per minute at 7°C for 6 minutes and the serum was  
200 aliquoted within one hour of obtainment. Processed aliquots were stored in a -80°C freezer  
201 within one hour of collection until the study was completed to analyze all samples in one  
202 batch. Analysis was conducted by Synevo Studien Service Labor GmbH c/o IMD Institut für  
203 Medizinische Diagnostik Berlin-Potsdam GbR, Berlin, Germany. We measured IL-6, CRP, and  
204 TNF-  $\alpha$ .

205

206 Anthropometric data

207 Body mass index (BMI) was measured as body weight (kg) divided by squared body height  
208 ( $m^2$ ). Participants were weighed in light clothes and without shoes in a fasted state on the  
209 same weight scale (100 g resolution, Seca GmbH, Germany) and their height was measured  
210 while standing against the wall with a fixed measuring scale (0.5 cm resolution, Seca GmbH,  
211 Germany). Percent body fat mass was measured using bioimpedance analysis with  
212 BIACORPUS RX 4004M (Medi Cal Healthcare GmbH, Karlsruhe, Germany) and two electrodes  
213 each at both hands and feet. Body fat mass was sex-standardized using z-transformation  
214 before analysis.

215

216 Habitual dietary fiber intake

217 For estimation of the amount of habitual dietary fiber intake, participants were asked to  
218 complete the validated German food frequency questionnaire (DEGS1 FFQ) (Haftenberger et

219 al. 2010) at each assessment. An in-house scoring tool was used to estimate the consumption  
220 of single food items and resulting daily nutrient intake based on self-report of frequency and  
221 quantity within seven days (Thieleking et al. 2023). We measured the amount of fiber intake  
222 using two different units: fiber in grams per day (absolute intake) and fiber per 1000kcal per  
223 day (relative intake) to adjust for overall caloric intake.

224

#### 225 MRI acquisition

226 MRI was performed on a 3T Siemens Prismafit scanner with a 32-channel head coil. MRI was  
227 acquired using a T1-weighted MPRAGE sequence using the ADNI protocol with the following  
228 parameters: TR = 2300ms; TE = 2.98ms; flip angle = 9°; FOV: (256 mm)<sup>2</sup>; voxel size: (1.0mm)<sup>3</sup>;  
229 176 slices. Diffusion-weighted MRI (dwMRI) was acquired using the following parameters: TR  
230 = 5200ms; TE = 75ms; flip angle = 90°; FOV: (220 mm)<sup>2</sup>; voxel size: (1.7mm)<sup>3</sup>; 88 slices; max.  
231 b=1000 s/mm<sup>2</sup> in 60 diffusion directions; partial Fourier=7/8; GRAPPA-factor = 2; interpolation  
232 = OFF. Ap/pa-encoded b0-images were acquired for distortion correction.

233

#### 234 MRI data preprocessing

235 Anatomical images were automatically processed with the FreeSurfer v6.0.0p1 longitudinal  
236 stream, total intracranial volume per person and per time point was extracted based on the  
237 unbiased within-subject template space and image (Reuter et al. 2012). Several processing  
238 steps, such as skull stripping, Talairach transforms, atlas registration as well as spherical  
239 surface maps and parcellations were then initialized with common information from the  
240 within-subject template, to increase reliability and statistical power.

241 DwMRI preprocessing was performed with standard pipelines, including denoising (MRtrix  
242 v3.0; (Veraart, Fieremans, and Novikov 2016) of the raw data, removal of Gibbs-ringing artifact

243 from all b0-images using the local subvoxel-shift method (Kellner et al. 2016) and outlier  
244 replacement using the EDDY tool (Andersson et al. 2016; Andersson and Sotiropoulos 2016)  
245 in FSL 6.0.1. (Smith et al. 2004). Subsequently, data was corrected for susceptibility distortions  
246 using topup (FSL) (Andersson, Skare, and Ashburner 2003). Brain masks of the unwarped b0-  
247 images were created using BET (Smith 2002) from FSL to correct for head motion and eddy  
248 currents using the EDDY tool (FSL; Bastiani et al. 2019). We applied tensor model fitting using  
249 DTIFit (FSL) to generate mean diffusivity (MD).

250

#### 251 Quality control of preprocessed DWI data.

252 Using EDDY QC tools (FSL 6.0.1), quality control on person-wise and group-wise level have  
253 been performed with EDDY QUAD and EDDY SQUAD v1.0.2, respectively (Bastiani et al. 2019).  
254 The group-wise QC metrics (motion parameters, eddy currents, signal-to-noise ratio (SNR) and  
255 contrast-to-noise ratio (CNR)) have been compared to standard values (see **Table 1, Extended**  
256 **Fig. 2-1, 2-2**). Based on this assessment, we did not exclude any participants from analysis.

257 **Table 1: Diffusion-weighted imaging (DWI) Quality Control.** Group-wise quality metrics  
258 provided by eddy squad for DWI data.

|               | Signal-to-noise ratio (SNR) | Contrast-to-noise ratio (CNR) | avg. absolute motion [mm] | avg. relative motion [mm] |
|---------------|-----------------------------|-------------------------------|---------------------------|---------------------------|
| Mean          | 40.93                       | 4.13                          | 0.27                      | 0.12                      |
| SD            | 7.15                        | 0.73                          | 0.19                      | 0.06                      |
| Mean +/- 1 SD | 33.78                       | 3.40                          | 0.46                      | 0.17                      |
| Mean +/- 2 SD | 26.64                       | 2.67                          | 0.65                      | 0.23                      |

259 Overall, data quality of DWI data was judged as very good without extreme values according to quality  
260 metrics provided by eddy squad.

261

262

263

#### 264 Hypothalamus segmentation.

265 Deviant to the pre-registration, we used automated segmentation of the bilateral  
266 hypothalamus using a deep learning algorithm (Billot et al. 2020) implemented in python  
267 scripts (v3.6) due to faster and more reliable results. Briefly, four hypothalamic regions were  
268 segmented at each hemisphere (**Figure 2**). Visual checks for correct segmentation on the  
269 structural image were done for all subjects. Volumes for total bilateral hypothalamus were  
270 extracted for each individual and for each of the up to four datapoints. Subnuclei were  
271 disregarded for statistical inference analysis to reduce Type II errors.

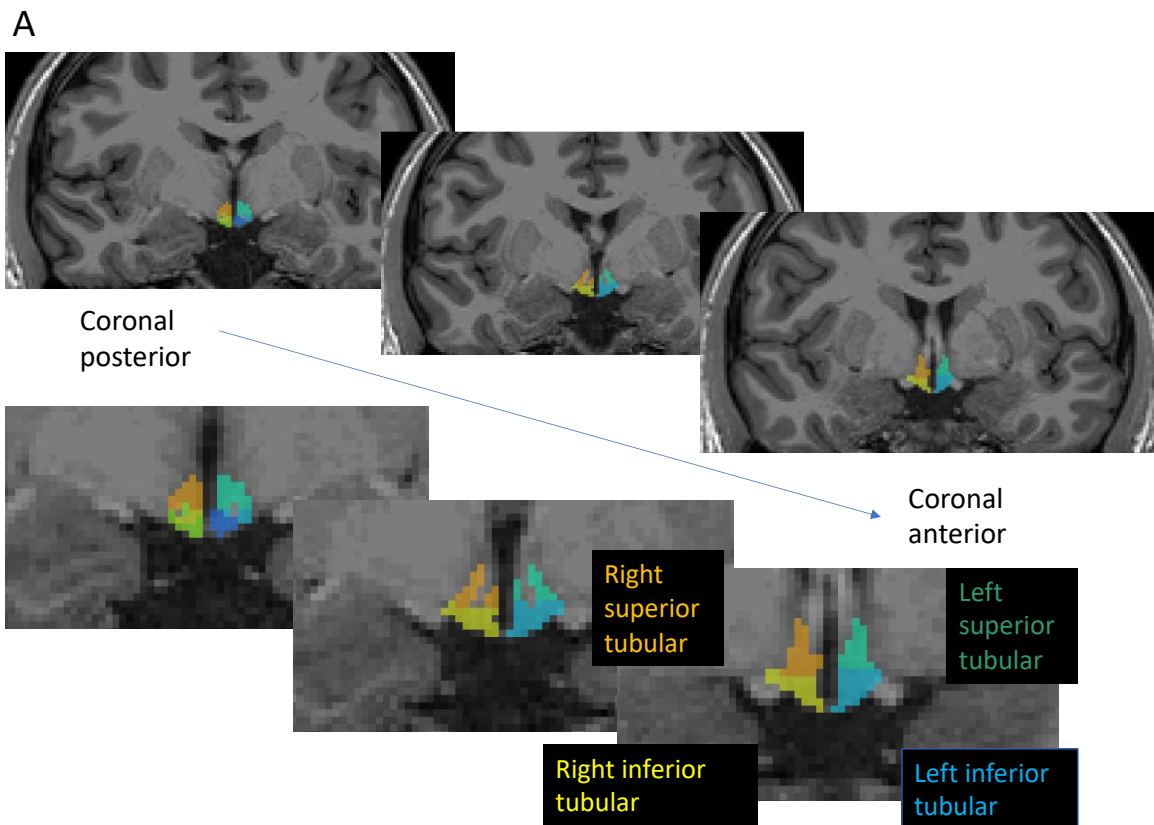

272

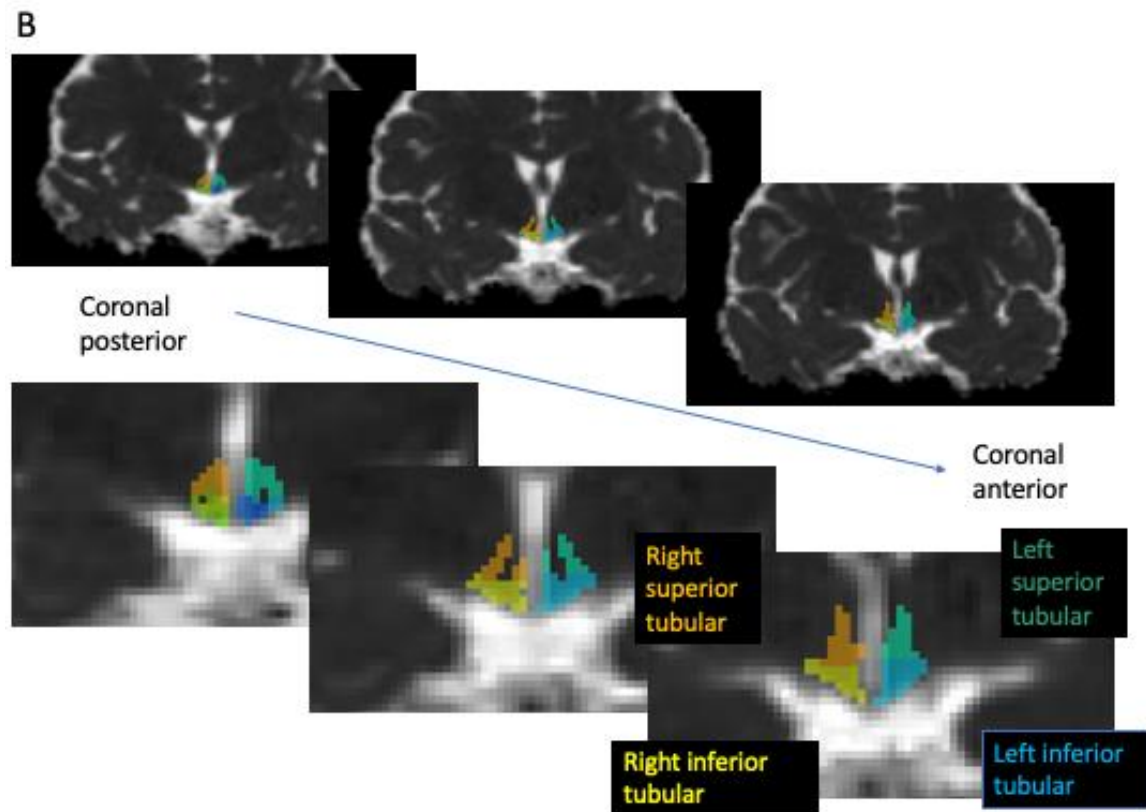

273  
274 **Fig. 2: Examples of automatically segmented hypothalamus subnuclei on a participant's T1-weighted image**  
275 **(A) and respective mean diffusivity (MD) maps (B) in coronal slices.** Colors give hypothalamic subnuclei (light  
276 blue = left inferior tubular, yellow= right inferior tubular, orange = right superior tubular, turquoise= left superior  
277 tubular).  
278

279 Hypothalamic MD. To avoid partial volume effects at the border to the adjacent ventricle, we  
280 first extracted MD values of the third ventricle based on FS LONG template and the ventricle  
281 region according to the Deskian/Killiany atlas (labels 14) (Thomas et al. 2019). Next, we  
282 extracted bilateral hippocampus as a control region of non-interest (based on FS LONG  
283 automatic segmentation (aseg.mgz) and Deskian/Killiany atlas labels 17 + 53). MD images  
284 were coregistered to the respective subject- and time point-specific FS LONG with FSL's FLIRT  
285 using 6 degrees of freedom. Then, the registration matrix was used to coregister the MD  
286 images to the anatomical space. Using fsstats (FSL), the mean MD of the third ventricle has  
287 been used as an upper threshold for calculating the mean MD of the hypothalamus and the  
288 hippocampus, respectively. Analysis code is openly available at  
289 <https://gitlab.gwdg.de/omega-lab/hypothalamus-segmentation-and-md-extraction>.

290

291 Statistical analyses

292 R version 4.2.2 was used to perform statistical analysis with linear mixed effects models. We  
293 controlled for possible confounding effects of body fat mass and BMI since visceral adipose  
294 tissue has previously shown to increase proinflammatory cytokines such as TNF- $\alpha$   
295 (Hotamisligil, Shargill, and Spiegelman 1993) and a higher BMI has been linked to increased  
296 hypothalamic MD (Thomas et al. 2019). Deviant to the pre-registration, we decided to use  
297 lmer function (instead of lm function) in hypotheses 1) and 2) from the R-package lme4 to  
298 account for subject as a random factor in order to use all timepoints (up to four per individual)  
299 as repeated measures. This required to additionally control for intervention condition and  
300 timepoint. Hypotheses 1-4 were tested with the following models:

301 H1) Null model: `lmer(inflammatory_markers~age+sex+`  
302 `body_fat_mass+intervention_condition+timepoint+ (1|subj)),`  
303 R1: `lmer(inflammatory_markers~fiber_intake+age+sex+ body_fat_mass`  
304 `+intervention_condition+timepoint+ (1|subj))`

305

306 H2) Null model: `lmer(hypothalamic_MD~ age+ sex+BMI+intervention_condition+timepoint+`  
307 `(1|subj))`

308 R1: `lmer(hypothalamic_MD~ fiber_intake+age+ sex+BMI+`  
309 `intervention_condition+timepoint+ (1|subj))`

310

311 H3) Null model: `lmer(inflammatory_markers~ intervention_condition+timepoint+ (1|subj))`

312 R1: `lmer(inflammatory_markers~ timepoint*intervention_condition +`  
313 `intervention_condition + timepoint + (1|subj))`

314

315 H4) Null model:  $\text{Imer}(\text{hypothalamic\_MD} \sim \text{intervention\_condition} + \text{timepoint} + (1 | \text{subj}))$

316 R1:  $\text{Imer}(\text{hypothalamic\_MD}_i \sim \text{time point} * \text{intervention\_condition} + \text{intervention\_condition} +$

317  $\text{timepoint} + (1 | \text{subj}))$

318

## 319 **Results**

### 320 Descriptives

321 Main analysis included 59 participants with complete baseline assessments (19 women, 40

322 men) and up to 3 additional assessments adding to maximal 205 observations per outcome

323 (flowchart detailing missing values in **Extended Fig. 1-1**). Participants were 19 to 45 years old

324 (28.3 years  $\pm$  6.57 SD), their body fat mass ranged from 7.6% to 39.8% (mean 27.1 %  $\pm$  6.6 SD)

325 and self-reported daily habitual fiber intake was diverse and moderate (mean 16.3 g/d  $\pm$  6.3

326 SD, range 1.5 to 30.5) (**Table 2**). Hypothalamic volume and MD values ranged from 707 to

327 1050 mm<sup>3</sup> and 0.87\*10<sup>-3</sup> to 1.1\*10<sup>-3</sup> mm<sup>2</sup>/s, respectively. We observed sex differences in

328 hypothalamic volume size, with higher volumes in males compared to females independent

329 of head size differences. Data across all time points are given in **Extended Fig. 3-1, Extended**

330 **Table 3-1.**

331 As 86% of IL-6 measures laid under the lower limit of quantification we decided to omit IL-6

332 from statistical analyses (see below for a qualitative evaluation of intervention effects). CRP

333 was used on a log-scale due to skewed distribution (skewness 0.09 for log-transformed data

334 as opposed to 8.18, if not log-transformed).

335 **Table 2: Characteristics of study participants at first assessment (baseline, BL, 1).**

|                                                          | <b>BL1<br/>(n = 59)</b>                                                  |
|----------------------------------------------------------|--------------------------------------------------------------------------|
| <b>Sex</b>                                               |                                                                          |
| F                                                        | 19 (32.2%)                                                               |
| M                                                        | 40 (67.8%)                                                               |
| <b>Age</b>                                               |                                                                          |
| Mean (SD)                                                | 28.3 (6.55)                                                              |
| Median [Min, Max]                                        | 28.0 [19.0, 45.0]                                                        |
| <b>BMI (kg/m<sup>2</sup>)</b>                            |                                                                          |
| Mean (SD)                                                | 27.3 (1.51)                                                              |
| Median [Min, Max]                                        | 27.0 [25.0, 30.0]                                                        |
| <b>Fat mass (%)</b>                                      |                                                                          |
| Mean (SD)                                                | 27.1 (6.60)                                                              |
| Median [Min, Max]                                        | 26.5 [7.59, 39.8]                                                        |
| Missing                                                  | 1 (1.7%)                                                                 |
| <b>Fiber (g/day)</b>                                     |                                                                          |
| Mean (SD)                                                | 16.3 (6.26)                                                              |
| Median [Min, Max]                                        | 15.4 [1.54, 30.5]                                                        |
| <b>Fiber(g/1000kcal/day)</b>                             |                                                                          |
| Mean (SD)                                                | 10.2 (3.05)                                                              |
| Median [Min, Max]                                        | 10.5 [2.35, 20.0]                                                        |
| <b>IL-6 (pg/ml)</b>                                      |                                                                          |
| Mean (SD)                                                | 1.35 (1.49)                                                              |
| Median [Min, Max]                                        | 1.00 [1.00, 10.1]                                                        |
| Missing                                                  | 2 (3.4%)                                                                 |
| <b>IL-6 (log<sub>10</sub>-transformed)</b>               |                                                                          |
| Mean (SD)                                                | 0.0539 (0.193)                                                           |
| Median [Min, Max]                                        | 0 [0, 1.00]                                                              |
| Missing                                                  | 2 (3.4%)                                                                 |
| <b>CRP (mg/l)</b>                                        |                                                                          |
| Mean (SD)                                                | 3.09 (3.77)                                                              |
| Median [Min, Max]                                        | 1.94 [0.150, 18.4]                                                       |
| Missing                                                  | 2 (3.4%)                                                                 |
| <b>CRP (log<sub>10</sub>-transformed)</b>                |                                                                          |
| Mean (SD)                                                | 0.204 (0.539)                                                            |
| Median [Min, Max]                                        | 0.288 [-0.824, 1.26]                                                     |
| Missing                                                  | 2 (3.4%)                                                                 |
| <b>TNF-α (pg/ml)</b>                                     |                                                                          |
| Mean (SD)                                                | 5.75 (1.99)                                                              |
| Median [Min, Max]                                        | 5.80 [2.00, 11.2]                                                        |
| Missing                                                  | 2 (3.4%)                                                                 |
| <b>Mean MD bilateral hypothalamus (mm<sup>2</sup>/s)</b> |                                                                          |
| Mean (SD)                                                | 1.00*10 <sup>-3</sup> (43.2*10 <sup>-6</sup> )                           |
| Median [Min, Max]                                        | 1.00*10 <sup>-3</sup> [0.886*10 <sup>-3</sup> , 1.10*10 <sup>-3</sup> ]  |
| <b>Hypothalamic volume (mm<sup>3</sup>)</b>              |                                                                          |
| Mean (SD)                                                | 887 (68.7)                                                               |
| Median [Min, Max]                                        | 894 [709, 1030]                                                          |
| <b>Mean MD bilateral hippocampus (mm<sup>2</sup>/s)</b>  |                                                                          |
| Mean (SD)                                                | 0.953*10 <sup>-3</sup> (26.9*10 <sup>-6</sup> )                          |
| Median [Min, Max]                                        | 0.950*10 <sup>-3</sup> [0.896*10 <sup>-3</sup> , 1.01*10 <sup>-3</sup> ] |

BMI, body mass index, IL-6, interleukin-6, CRP, high-sensitive C-reactive protein, TNF-α, tumor-necrosis factor alpha, MD, mean diffusivity

336  
337  
338



339 **Habitual fiber intake, inflammatory markers, and hypothalamic microstructure**

340 As preregistered, we assessed whether habitual dietary fiber intake linked to inflammatory  
341 markers and hypothalamic MD. Against our hypotheses, we could not observe significant  
342 associations between absolute or relative habitual fiber intake and TNF- $\alpha$  or CRP (model  
343 comparisons, all  $p > 0.37$ , **Extended Table 3-2 and 3-3**). Neither did we detect significant  
344 associations between fiber intake and hypothalamic MD, or hippocampal MD as control region  
345 (model comparison, all  $p > 0.27$ ; **Extended Tables 3-4 and 3-5**).

346 Notably, male sex predicted lower levels of CRP ( $\beta = -0.6$ ,  $p < 0.001$ , **Fig. 3A**). Additionally,  
347 higher body fat (sex-standardized,  $\beta = 0.16$ ,  $p = 0.002$ ) related to higher CRP levels,  
348 independent of the amount of fiber intake (**Fig. 3A**). This link was not observed for TNF- $\alpha$   
349 (male sex,  $p = 0.17$ , body fat,  $p = 0.22$ ). Moreover, lower hypothalamic MD was borderline  
350 associated with higher BMI (**Fig. 3B**, all  $p < 0.052$ , **Extended Table 3-4**).

351

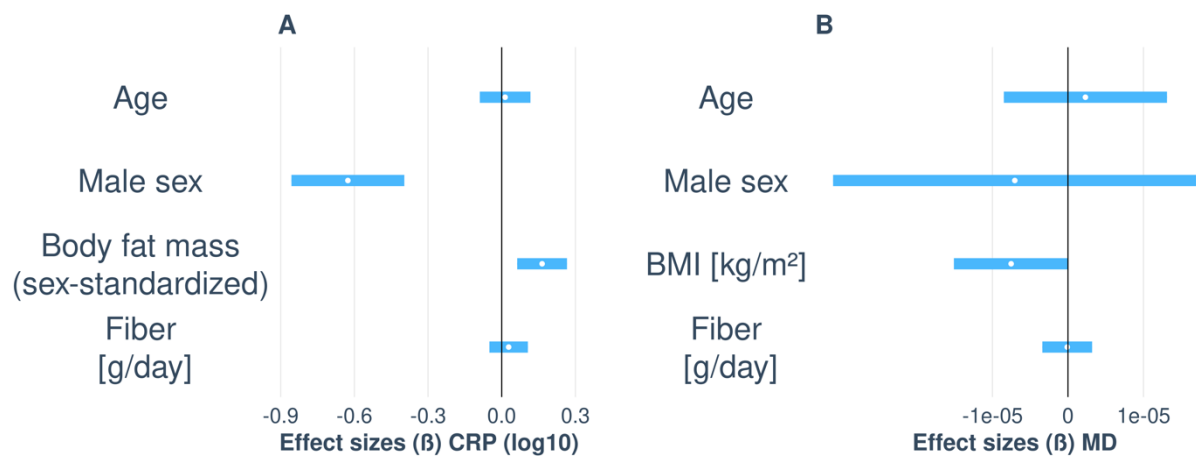

352

353 **Fig. 3: Visualization of unstandardized regression coefficients of baseline models for log-transformed CRP (A)**  
354 **and hypothalamic mean diffusivity (MD) (B), including habitual fiber intake as predictor of interest in**  
355 **comparison to null models (not depicted). Bars depict 95% CI.**  
356

357 Additionally, we explored potential correlations between inflammatory markers and body fat  
358 mass in percent stratified by sex due to the observed prediction of lower CRP levels by male  
359 sex. Higher body fat somewhat correlated with higher CRP in both females and males, yet the

360 association was not significant in females (**Fig. 4**; female:  $r = 0.03$ ,  $p = 0.74$ ,  $n = 18$ ; male:  $\beta =$   
361  $0.18$ ,  $t = 2.8$ ,  $p = 0.01$ ,  $n = 40$ ). We did not observe significant associations with TNF- $\alpha$  and body  
362 fat (all  $p > 0.35$ ).

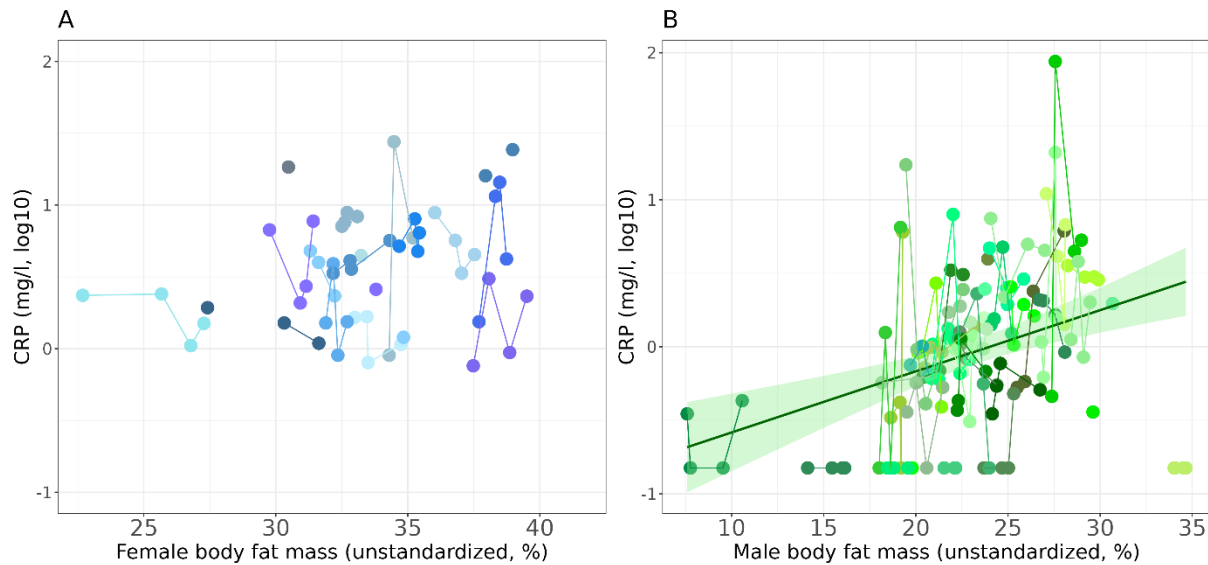

364 **Fig. 4:** Correlations of body fat mass (FM) in % and log-transformed CRP in females (A) and males (B). Colors code  
365 for participant (shading, up to four records) and sex (blue female, green male). Lines indicates regression fit with  
366 the lightgreen ribbons represent pointwise 95% CI of the means.  
367

368

369

370 When exploring the borderline association between higher BMI and lower hypothalamic MD  
371 stratified for sex, the effect was not evident (**Fig. 5**; model comparisons, females:  $p = 0.35$ ,  
372 males:  $p = 0.12$ ).

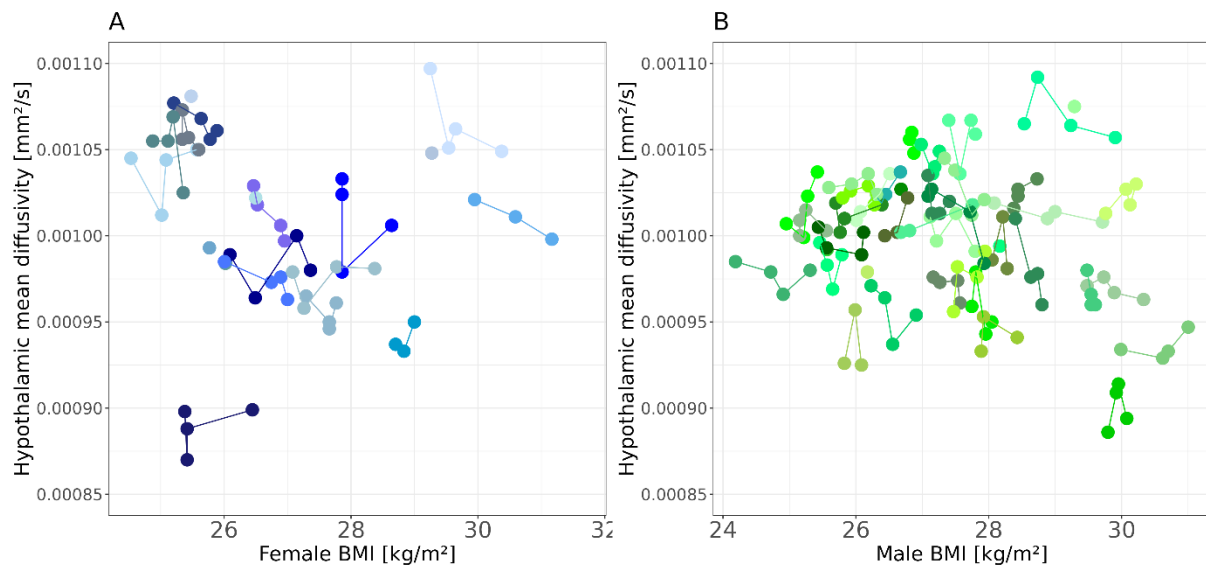

373

374 **Fig.5: Hypothalamic mean diffusivity (MD) in relation to body mass index (BMI) in females (A) and males (B).**  
375 Colors code for participant (shading, up to four records) and sex (blue female, green male). Lines connect  
376 individuals.

377

378

379

### 380 **Effects of 14 days of high-dosed prebiotic fiber intake on inflammatory markers and** 381 **hypothalamic microstructure**

382 The two-week high-fiber intervention, compared to placebo, did not have significant effects  
383 neither on inflammatory markers (Fig. 6A-B, Extended Table 6-1 and 6-2, model comparison  
384  $p = 0.59$  for  $\text{TNF-}\alpha$ , model comparison  $p = 0.29$  for CRP) nor on brain microstructure, i.e.,  
385 neither hypothalamic MD (Fig. 6C, Extended Table 6-3, model comparison  $p = 0.08$ ) nor the  
386 MD of the control region, the hippocampus, were altered by the high-dosed fiber intake (Fig.  
387 6D, Extended Table 6-4, model comparison  $p = 0.87$ ).

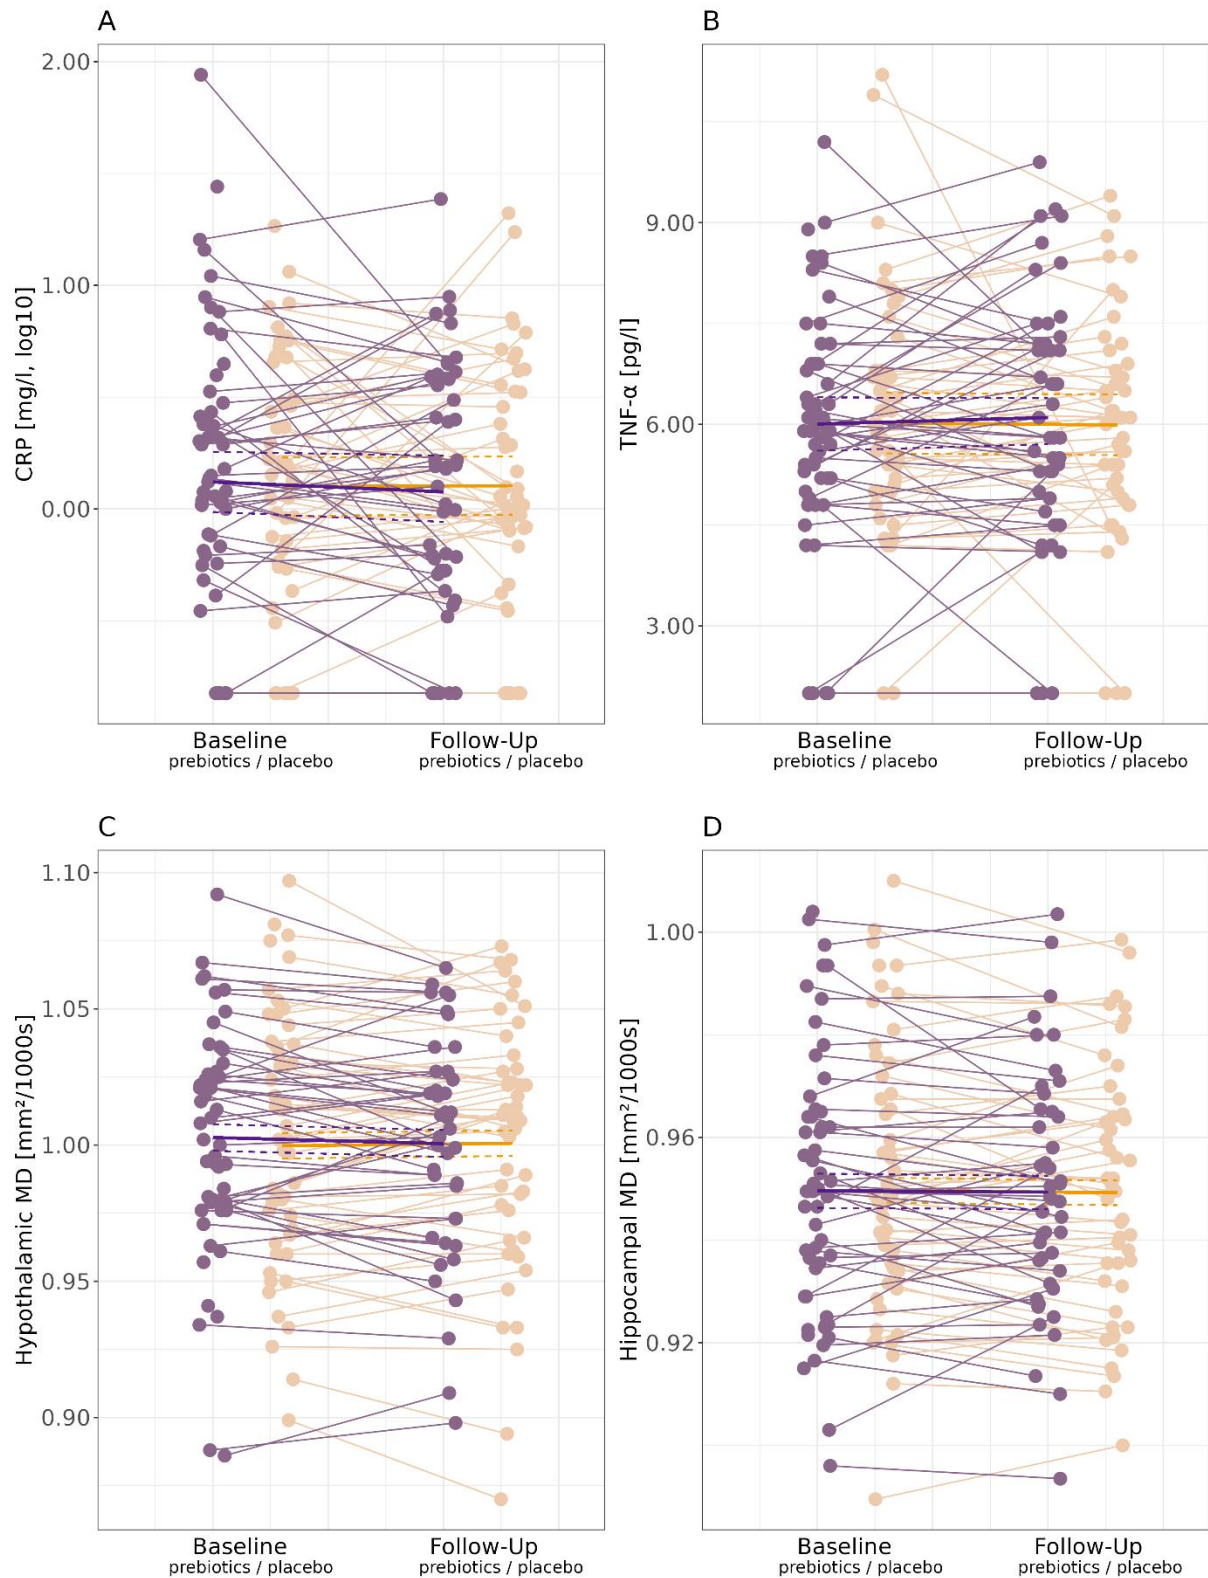

388

389

390

391

392

393

394

**Fig.6: Changes in log-transformed CRP (CRP\_log10, A), TNF-α (B), hypothalamic MD (C), and hippocampal MD (D) from baseline (BL) to follow-up (FU) measurements before and after 14 days of prebiotic fiber intake (violet) and placebo (light orange), respectively. Lines give individual's change, bold lines give mean change per condition, dashed lines 95% confidence interval of the mean.**

395 When looking qualitatively at IL-6, when assigning 0 to values with below detection threshold  
396 and focusing on participants with two or more measurements, IL-6 measures changed in 8  
397 participants after fiber (5 decreases, 3 increases) and in 11 participants after placebo (7  
398 decreases, 4 increases), while the majority did not change.

399

400 In exploratory analysis, we investigated a potential association between peripheral (CRP, TNF-  
401  $\alpha$ ) and central (hypothalamic MD) inflammatory markers across all four time points. We used  
402 linear mixed regression to model the effect of serum inflammatory markers on MD corrected  
403 for sex, age, BL/FU visit and intervention as covariates and subject as random factor. Chi-  
404 squared tests were used to compare models including the marker against models containing  
405 only variables we corrected for. Neither the comparison of log-transformed CRP ( $p = 0.93$ ) nor  
406 TNF-  $\alpha$  ( $p = 0.06$ ) showed a significant effect (**Fig. 7, Extended Tables 7-1 and 7-2**).

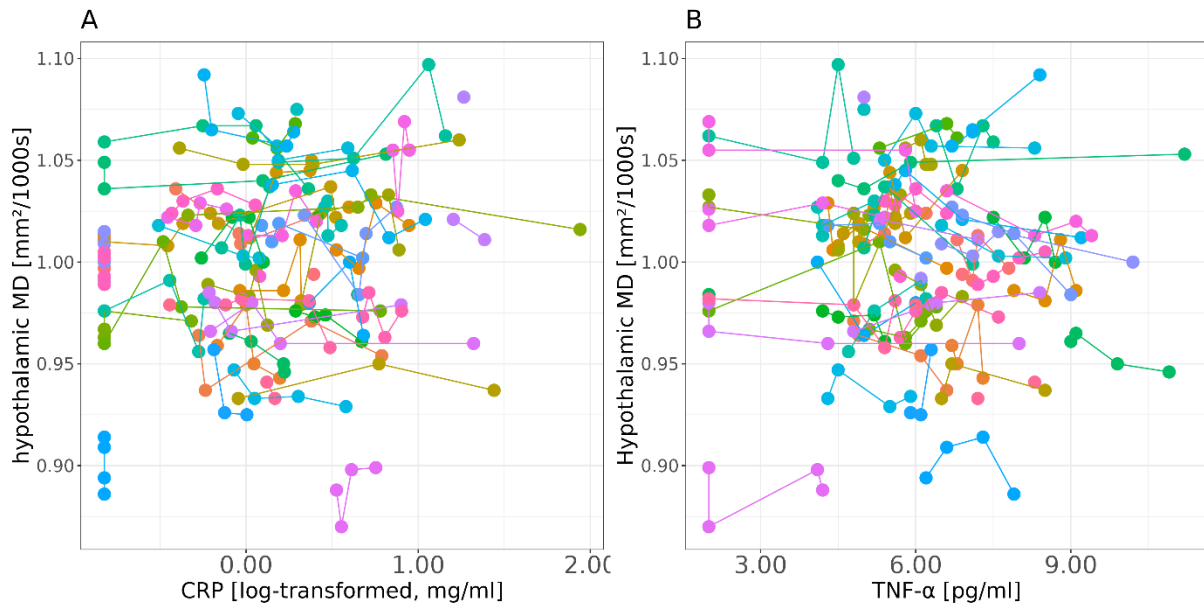

407

408 **Figure 7: Peripheral compared to central markers of inflammation.** (A) log-transformed CRP, (B) TNF- $\alpha$ . Colors  
409 code for participants, (up to four records per subject), lines connect participants.

410

411 Exploratory analysis of habitual and intervention effects of dietary fiber on hypothalamic  
412 volume (corrected for total intracranial volume) did not reveal significant changes (time by  
413 group interaction:  $|\beta| = 5.12$ ,  $p = 0.21$ , **Extended Tables 7-3 and 7-4**).

414

## 415 **Discussion**

416 In this well-characterized sample of 59 overweight young to middle aged adults, systemic and  
417 (neuro-)inflammatory processes measured in blood and hypothalamus were not significantly  
418 related to prebiotic fiber intake, i.e. neither to self-reported, habitual intake nor to short-term  
419 high-dosed interventional intake for 14 days. Exploratory analyses indicated that sex and body  
420 fat related to higher CRP serum levels, while higher BMI was borderline associated with  
421 coherence of hypothalamic microstructure, represented in MD.

422

### 423 *Prebiotic fiber intake and peripheral markers of inflammation*

424 Considering blood-based inflammatory markers, we could not confirm that habitual fiber  
425 intake related to lower fasting levels of CRP, TNF- $\alpha$  or IL-6, or that a high-fiber intervention  
426 decreased these inflammatory markers in our sample. These null results thus question a  
427 strong effect of fiber intake on markers of systemic inflammation. Causal evidence for  
428 inflammation-lowering effects of high-fiber diets based on interventional studies is indeed  
429 scarce: King et al. observed decreases in CRP after three weeks of two different high-fiber  
430 diets. However, this observation applied only to a specific subgroup, i.e., the lean group of  
431 the study population (17 participants) and not to participants living with obesity (18  
432 participants). Further, there was no placebo control, so that test-retest effects could not be  
433 ruled out (King et al. 2007). More recent controlled RCTs observed decreases in TNF-  $\alpha$  and IL-  
434 6, but not in CRP, in 52 women with type-2 diabetes (mean age 48 years) after 8 weeks of 10  
435 g/d inulin (Dehghan, Pourghassem Gargari, and Asghari Jafar-abadi 2014), and in a group of

436 42 overweight and obese children after 16 weeks of inulin supplementation (Nicolucci et al.  
437 2017). In general, dietary intervention studies such as ours are often difficult to monitor and  
438 can therefore be limited by false reports of habitual dietary intake or insufficient supplement  
439 intake. Of note, we did not observe significant effects when controlling for total energy intake  
440 to control potential over- or under-reporting, and all participants reported regular  
441 supplement intake according to self-report. The lacking effect of fiber intake on systemic  
442 inflammation in our study might be also attributed to ceiling effects. For instance, room for  
443 inflammatory improvement might have been limited in our study population of overweight  
444 young adults as they showed only low-grade inflammation levels (indicated by floor-levels of  
445 IL-6) and were metabolically healthy. Participants in our study also already showed an average  
446 moderate, habitual dietary fiber intake of 16 g/day, outperforming previous study populations  
447 (Dehghan, Pourghassem Gargari, and Asghari Jafar-abadi 2014). In addition, the timeframe of  
448 the intervention might have been too short to induce significant effects (two weeks in  
449 comparison to 8 (Dehghan, Pourghassem Gargari, and Asghari Jafar-abadi 2014) and 16 weeks  
450 (Nicolucci et al. 2017). As CRP-levels were not altered by fiber supplementation in previous  
451 studies, it might not be sensitive enough towards fiber diet-induced changes. However, IL-6  
452 levels, which had been lowered in previous studies by fiber supplementation, were in most  
453 cases already below detection threshold at baseline in our study population, so already at the  
454 healthier end.

455 On the neural level, hypothalamic microstructure was not related to neither habitual nor  
456 supplemental fiber intake. After two weeks of intervention, we observed that mean  
457 hypothalamic MD tended to marginally decrease in the fiber intervention condition and  
458 marginally increase after placebo intake, however, changes appeared negligible in size and  
459 need to be interpreted with caution due to a lack of significance in the time-by-group



460 interaction ( $p = 0.07$ ). Our results are in line with a previous systematic review reporting rather  
461 non-significant effects or very small effect sizes across five RCTs investigating Mediterranean  
462 dietary intervention effects on cognition and brain functions (Radd-Vagenas et al. 2018). In a  
463 closely controlled environment, however, Song et al. could show that greater adherence to  
464 Mediterranean diet, indicative of high-fiber intake, linked to less progression of white matter  
465 lesions, probable of vascular and inflammatory pathology, in a prospective study over the  
466 course of 5 years (Song et al. 2022). Further, a three-months Mediterranean-DASH  
467 intervention led to an increase in surface area of the inferior frontal gyrus suggesting that such  
468 a dietary intervention can reverse the potentially adverse effects of previous unhealthy diet  
469 on brain structure (Arjmand, Abbas-Zadeh, and Eftekhari 2022). Notably, evidence of diet-  
470 body/brain effects might be biased by inaccuracies in study conception and conduction, in  
471 particular concerning dietary reporting, underpowered studies and short time-frames  
472 (Duplantier and Gardner 2021).

473 The lack of a significant effect of fiber in our sample might also be explained by the overall  
474 healthy condition of participants: hypothalamic MD was lower, indicative of healthier tissue,  
475 compared to populations with a three decades-higher mean age (Thomas et al. 2019).  
476 Additionally, our study was not powered for the detection of short-term intervention effects  
477 on young adults' brain microstructure. As absence of evidence does not prove evidence of  
478 absence, fiber-induced brain changes might be observable in larger or metabolically  
479 conspicuous populations. We suggest that future studies should be designed with longer  
480 intervention durations or with patient populations (e.g., including aging or metabolic disease).  
481 Data pooling can additionally increase sample size to increase the probability of more definite  
482 conclusions.



483 Investigating the effect of confounding variables in exploratory analyses, we observed that  
484 higher body fat mass was associated with higher CRP in blood. Detrimental effects of body fat  
485 mass on inflammatory markers have been shown previously (Festa et al. 2001). A causal link  
486 has been indicated by reversibility experiments in normal-weight, physically active individuals,  
487 where weight loss was paralleled by decreased low-grade inflammation (Sarin et al. 2019).  
488 In addition, men had lower levels of CRP similar to pre-midlife populations (Sarin et al. 2019),  
489 and higher body fat related to higher CRP in males in our sample. This might have contributed  
490 to the observation of lower inflammation values in males. Unfortunately, our sample  
491 consisted of more males than females due to more strict exclusion criteria for women.  
492 Underlying potential sex differences, the effects of higher BMI on promoting systemic  
493 inflammation have previously been shown to be less pronounced in men compared to women  
494 (Choi, Joseph, and Pilote 2013). We further found higher BMI to be borderline related to lower  
495 hypothalamic MD. Previous results from our and other groups in on average older participants  
496 rather indicated that higher BMI, as well as higher age, related to lower MD in the  
497 hypothalamus (Birdsill et al. 2017; Dekkers, Jansen, and Lamb 2019; Kullmann et al. 2016;  
498 Lampe et al. 2019; Thomas et al. 2019; Sewaybricker et al., 2023), however, one earlier study  
499 reported higher values of the apparent diffusion coefficients correlating with higher BMI in  
500 the hypothalamus in middle old adults (Alkan et al., 2008). Future studies are needed to  
501 further disentangle putative divergent patterns of hypothalamus MD and weight status in  
502 different age groups.

503 Taken together, sex and body composition across the lifespan likely affect peripheral  
504 inflammatory markers and brain microstructure more strongly, while dietary habits or short-  
505 term dietary interventions exert no strong effects. Indeed, self-reported dietary fiber  
506 assessment might have been too coarse, and the two weeks of intervention might not have

507 been long enough to induce changes on markers of systemic inflammation and at the brain  
508 microstructural level in this relatively healthy young and healthy population.

509

### 510 *Strengths and Limitations*

511 In sum, limitations of this study include the self-reported dietary measure and short  
512 intervention timeframe of two weeks. The validity of self-reported dietary intake and  
513 intervention compliance is a central concern of nutrition studies, questioning the overall  
514 reliability of (null) findings (Ioannidis 2018). In the current study, we estimated habitual  
515 dietary fiber intake from self-report using a validated quantitative food frequency  
516 questionnaire (Haftenberger et al. 2010) and developed a detailed diet scoring on macro- and  
517 micronutrient level (Thieleking et al. 2023). Our double-blinded interventional, cross-over  
518 within-subject design providing >200 repeated measures can be rated as gold standard.  
519 Supplementary fiber intake compliance during intervention was high according to daily diaries  
520 (average missed intakes  $1.25 \pm 1.8$ , min = 0, max = 9). Within our study, we also collected stool  
521 samples which showed significant shifts in the gut microbiome after fiber intervention  
522 (Medawar 2021, Medawar, in press) indicating high compliance with the supplementation. In  
523 sum, quality of the dietary data and intervention compliance in the present analysis can be  
524 considered reliable.

525 Regarding population characteristics, we selected intuitive, omnivorous dieters in an  
526 overweight range. Therefore, the BMI range covered only a part of different body  
527 constitutions, so that our results cannot be transferred to other weight categories.  
528 Nonetheless, we deeply phenotyped all participants at each study time point collecting  
529 various serum markers, questionnaire data and high-resolution brain microstructural and  
530 structural data. Thereby, we reduced biases possibly interfering with effects of interest,

531 namely by adding confounding factors and random effects to our statistical models. For the  
532 difficult extraction of hypothalamic volume and MD values due to proximity to the third  
533 ventricle, we followed a state-of-art processing pipeline resulting in reliable measures of the  
534 hypothalamus. We also controlled for known influences on brain microstructure. We  
535 additionally want to emphasize that prior to completion of data acquisition and data analysis,  
536 we preregistered a detailed analysis plan (<https://osf.io/uzbav>) and provided open code for  
537 re-use.

538

### 539 **Conclusion**

540 In this study, we investigated whether a habitual high-fiber diet and a two-week prebiotic  
541 high-fiber intervention would reduce inflammatory processes. More precisely, we  
542 hypothesized a decrease in blood levels of CRP and TNF- $\alpha$  and in hypothalamic MD. Our  
543 findings do not support evidence for habitual or supplemented dietary fiber acting in an anti-  
544 inflammatory manner in this young, overweight population. Rather, sex and body composition  
545 were of higher importance for prediction of peripheral inflammation. Future trials are needed  
546 that implement more diverse age and weight status groups and a longer timeframe for  
547 prebiotic fiber supplementation, to advance our understanding of diet-brain modifications.

548

### 549 **Data availability**

550 Scripts for hypothalamus segmentation and extraction of MD are made available here:  
551 <https://gitlab.gwdg.de/omega-lab/hypothalamus-MD>.

552

### 553 **Author Contributions**

554 Study conception: EM, RT, AV, AVW, MS; data collection: EM, ET, RT; data curation: EM, ET;  
555 brain imaging data processing: EM, FB; first manuscript draft: EM, ET; all authors contributed  
556 to and accepted the final draft.

557

## 558 **References**

559 Alkan A, Sahin I, Keskin L, Cikim AS, Karakas HM, Sigirci A, Erdem G. Diffusion-weighted  
560 imaging features of brain in obesity. *Magn Reson Imaging*. 2008 May;26(4):446-50. doi:  
561 10.1016/j.mri.2007.10.004. Epub 2007 Dec 11. PMID: 18063337.

562 Arjmand, Golnaz, Mojtaba Abbas-Zadeh, and Mohammad Hassan Eftekhari. 2022. "Effect of  
563 MIND Diet Intervention on Cognitive Performance and Brain Structure in Healthy Obese  
564 Women: A Randomized Controlled Trial." *Scientific Reports* / 12: 2871.  
565 <https://doi.org/10.1038/s41598-021-04258-9>.

566 Birdsill, Alex Cole et al. 2017. "Abdominal Obesity and White Matter Microstructure in  
567 Midlife." *Human Brain Mapping* 38(7): 3337–44.

568 Byrne, C S, E S Chambers, D J Morrison, and G Frost. 2015. "The Role of Short Chain Fatty  
569 Acids in Appetite Regulation and Energy Homeostasis." *International Journal of Obesity*  
570 39(9): 1331–38. <https://doi.org/10.1038/ijo.2015.84>.

571 Cani, Patrice D. et al. 2008. "Changes in Gut Microbiota Control Metabolic Endotoxemia-  
572 Induced Inflammation in High-Fat Diet–Induced Obesity and Diabetes in Mice."  
573 *Diabetes* 55(5): 1484–90. <https://diabetes.diabetesjournals.org/content/57/6/1470>  
574 (March 26, 2020).

575 Choi, J., L. Joseph, and L. Pilote. 2013. "Obesity and C-Reactive Protein in Various  
576 Populations: A Systematic Review and Meta-Analysis." *Obesity Reviews* 14(3): 232–44.

577 Dalile, Boushra, Lukas Van Oudenhove, Bram Vervliet, and Kristin Verbeke. 2019. "The Role

- 578 of Short-Chain Fatty Acids in Microbiota–Gut–Brain Communication.” *Nature Reviews*  
579 *Gastroenterology & Hepatology* 16(8): 461–78. [https://doi.org/10.1038/s41575-019-](https://doi.org/10.1038/s41575-019-0157-3)  
580 0157-3.
- 581 Dehghan, Parvin, Bahram Pourghassem Gargari, and Mohammad Asghari Jafar-abadi. 2014.  
582 “Oligofructose-Enriched Inulin Improves Some Inflammatory Markers and Metabolic  
583 Endotoxemia in Women with Type 2 Diabetes Mellitus: A Randomized Controlled  
584 Clinical Trial.” *Nutrition* 30(4): 418–23.
- 585 Dekkers, Ilona A., Philip R. Jansen, and Hildo J. Lamb. 2019. “Erratum: Obesity, Brain Volume,  
586 and White Matter Microstructure at MRI: A Cross-Sectional UK Biobank Study.”  
587 *Radiology* 292(1): 763–71.
- 588 Deopurkar, Rupali et al. 2010. “Differential Effects of Cream, Glucose, and Orange Juice on  
589 Inflammation, Endotoxin, and the Expression of Toll-like Receptor-4 and Suppressor of  
590 Cytokine Signaling-3.” *Diabetes care* 33(5): 991–97.  
591 <https://pubmed.ncbi.nlm.nih.gov/20067961>.
- 592 Duplantier, Sally C, and Christopher D Gardner. 2021. “A Critical Review of the Study of  
593 Neuroprotective Diets to Reduce Cognitive Decline.”  
594 <https://doi.org/10.3390/nu13072264>.
- 595 Van Dyken, Peter, and Baptiste Lacoste. 2018. “Impact of Metabolic Syndrome on  
596 Neuroinflammation and the Blood–Brain Barrier.” *Frontiers in Neuroscience*  
597 12(December): 1–19.
- 598 Festa, A et al. 2001. 25 International Journal of Obesity *The Relation of Body Fat Mass and*  
599 *Distribution to Markers of Chronic Inflammation*. [www.nature.com/ijo](http://www.nature.com/ijo).
- 600 Haftenberger, Marjolein et al. 2010. “Relative Validation of a Food Frequency Questionnaire  
601 for National Health and Nutrition Monitoring.” *Nutrition journal* 9: 36.

- 602 Hotamisligil, Gokhan S, Narinder S Shargill, and Bruce M Spiegelman. 1993. "Adipose  
603 Expression of Tumor Necrosis Factor- $\alpha$ : Direct Role in Obesity-Linked Insulin  
604 Resistance." *259*(January): 87–92.
- 605 Ioannidis, John P.A. 2018. "The Challenge of Reforming Nutritional Epidemiologic Research."  
606 *JAMA - Journal of the American Medical Association* 320(10): 969–70.
- 607 King, Dana E. et al. 2007. "Effect of a High-Fiber Diet vs a Fiber-Supplemented Diet on C-  
608 Reactive Protein Level." *Archives of Internal Medicine* 167(5): 502–6.
- 609 Kullmann, Stephanie et al. 2016. "Specific White Matter Tissue Microstructure Changes  
610 Associated with Obesity." *NeuroImage* 125: 36–44.
- 611 Lampe, Leonie et al. 2019. "Visceral Obesity Relates to Deep White Matter Hyperintensities  
612 via Inflammation." *Annals of Neurology* 85(2): 194–203.
- 613 Lassenius, Mariann I et al. 2011. "Bacterial Endotoxin Activity in Human Serum Is Associated  
614 with Dyslipidemia, Insulin Resistance, Obesity, and Chronic Inflammation." *Diabetes  
615 care* 34(8): 1809–15. <https://pubmed.ncbi.nlm.nih.gov/21636801>.
- 616 Luying Peng, Zhong-Rong Li, Robert S. Green, Ian R. Holzman, and Jing Lin. 2009. "Butyrate  
617 Enhances the Intestinal Barrier by Facilitating Tight Junction Assembly via Activation of  
618 AMP-Activated Protein Kinase in Caco-2 Cell Monolayers." *The Journal of nutrition*  
619 139(9): 1619–25.
- 620 Ma, Yunsheng et al. 2008. "Association between Dietary Fiber and Markers of Systemic  
621 Inflammation in the Women's Health Initiative Observational Study." *Nutrition  
622 (Burbank, Los Angeles County, Calif.)* 24(10): 941–49.  
623 <https://pubmed.ncbi.nlm.nih.gov/18562168>.
- 624 Mazidi, Mohsen et al. 2018. "Effects of Selected Dietary Constituents on High-Sensitivity C-  
625 Reactive Protein Levels in U.S. Adults." *Annals of Medicine* 50(1): 1–6.

- 626 Medawar, Evelyn, Sebastian Huhn, Arno Villringer, and A Veronica Witte. 2019. "The Effects  
627 of Plant-Based Diets on the Body and the Brain: A Systematic Review." *Translational*  
628 *Psychiatry* 9(1): 226. <https://doi.org/10.1038/s41398-019-0552-0>
- 629 Medawar E, Beyer F, Thieleking R, Haange SB, Rolle-Kampczyk U, Reinicke M, Chakaroun R,  
630 von Bergen M, Stumvoll M, Villringer A, Witte AV (in press) A prebiotic diet changes  
631 neural correlates of food decision-making in overweight adults: a randomized  
632 controlled within-subject cross-over trial. *Gut*.
- 633 Morrison, Douglas J., and Tom Preston. 2016. "Formation of Short Chain Fatty Acids by the  
634 Gut Microbiota and Their Impact on Human Metabolism." *Gut Microbes* 7(3): 189–200.  
635 <http://dx.doi.org/10.1080/19490976.2015.1134082>.
- 636 Nicolucci, Alissa C. et al. 2017. "Prebiotics Reduce Body Fat and Alter Intestinal Microbiota in  
637 Children Who Are Overweight or With Obesity." *Gastroenterology* 153(3): 711–22.  
638 <http://dx.doi.org/10.1053/j.gastro.2017.05.055>.
- 639 Radd-Vagenas, Sue et al. 2018. "Effect of the Mediterranean Diet on Cognition and Brain  
640 Morphology and Function: A Systematic Review of Randomized Controlled Trials." *Am J*  
641 *Clin Nutr* 107: 389–404. [http://www.crd.york.ac.uk/PROSPERO/display\\_record.asp?ID=](http://www.crd.york.ac.uk/PROSPERO/display_record.asp?ID=)
- 642 Rocha, D. M. et al. 2016. "Saturated Fatty Acids Trigger TLR4-Mediated Inflammatory  
643 Response." *Atherosclerosis* 244: 211–15.  
644 <http://dx.doi.org/10.1016/j.atherosclerosis.2015.11.015>.
- 645 Sarin, H. V. et al. 2019. "Substantial Fat Mass Loss Reduces Low-Grade Inflammation and  
646 Induces Positive Alteration in Cardiometabolic Factors in Normal-Weight Individuals."  
647 *Scientific Reports* 9(1): 1–14.
- 648 De Silva, Akila, and Stephen R. Bloom. 2012. "Gut Hormones and Appetite Control: A Focus  
649 on PYY and GLP-1 as Therapeutic Targets in Obesity." *Gut and Liver* 6(1): 10–20.

650 Sewaybricker LE, Huang A, Chandrasekaran S, Melhorn SJ, Schur EA. The Significance of  
651 Hypothalamic Inflammation and Gliosis for the Pathogenesis of Obesity in Humans.  
652 *Endocr Rev.* 2023 Mar 4;44(2):281-296. doi: 10.1210/edrev/bnac023.

653 Song, Suhang et al. 2022. "Mediterranean Diet and White Matter Hyperintensity Change  
654 over Time in Cognitively Intact Adults." <https://doi.org/10.3390/nu14173664>.

655 Thaler, Joshua P, and Michael W Schwartz. 2010. "Minireview: Inflammation and Obesity  
656 Pathogenesis: The Hypothalamus Heats Up." *Endocrinology* 151(9): 4109–15.  
657 <https://pubmed.ncbi.nlm.nih.gov/20573720>.

658 Thieleking, Ronja, Lennard Schneidewind, Arsene Kanyamibwa, and Hendrik Hartmann.  
659 2023. "Nutrient Scoring for the DEGS1 - FFQ – from Food Intake to Nutrient Intake."  
660 *BMC Nutrition*: 1–16. <https://doi.org/10.1186/s40795-022-00636-2>.

661 Thomas, K. et al. 2019. "Higher Body Mass Index Is Linked to Altered Hypothalamic  
662 Microstructure." *Scientific Reports* 9(1): 1–11.

663 Wannamethee, S. Goya, Peter H. Whincup, Mary C. Thomas, and Naveed Sattar. 2009.  
664 "Associations between Dietary Fiber and Inflammation, Hepatic Function, and Risk of  
665 Type 2 Diabetes in Older Men: Potential Mechanisms for the Benefits of Fiber on  
666 Diabetes Risk." *Diabetes Care* 32(10): 1823–25.

667
